# Supplementary figures and images for: Measuring Interprofessional Collaboration’s Impact on Healthcare Services Using the Quadruple Aim Framework: A Protocol Paper
Source: MDPI journal article supplement (doi:10.3390/ijerph20095704), 2023-05-01

Supplementary Material

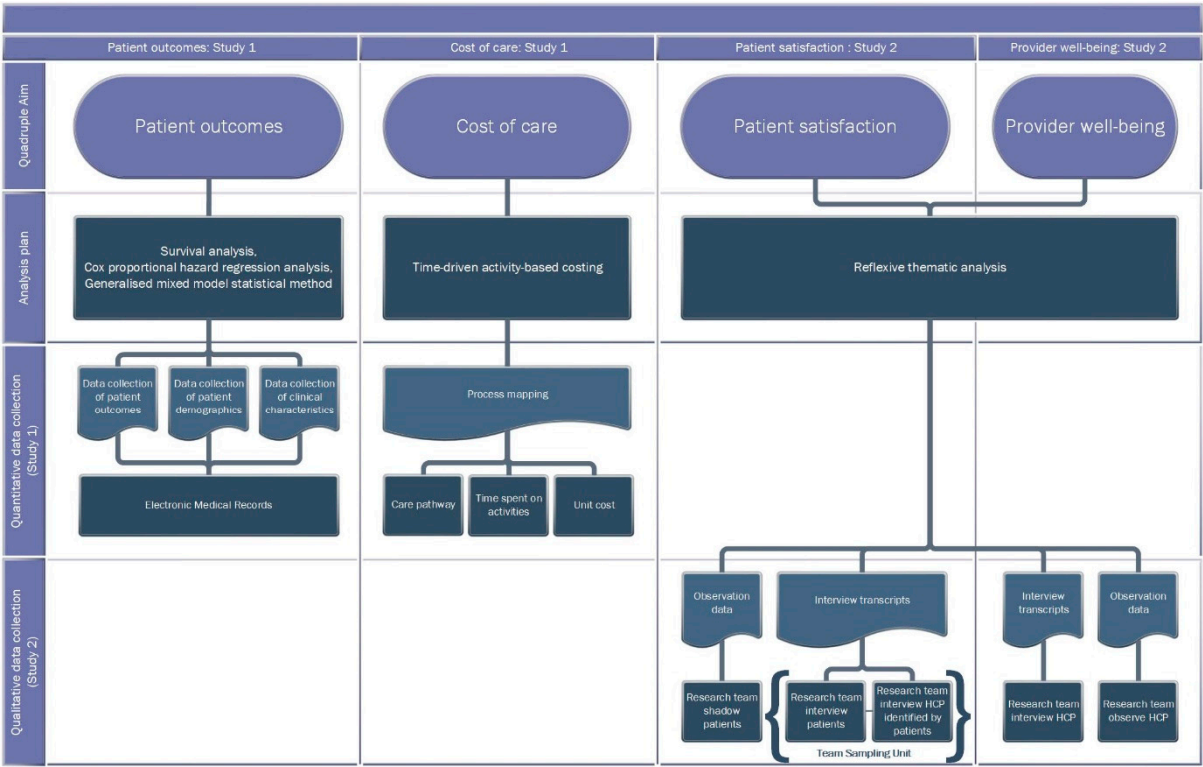

Figure S1. Protocol Workplan.

Supplement: s1 [file s1]
